# Supplementary material
Source: Frontiers journal article supplement (https://www.frontiersin.org/articles/337885)
Supplement: Image_5.PDF [file Image_5.PDF]

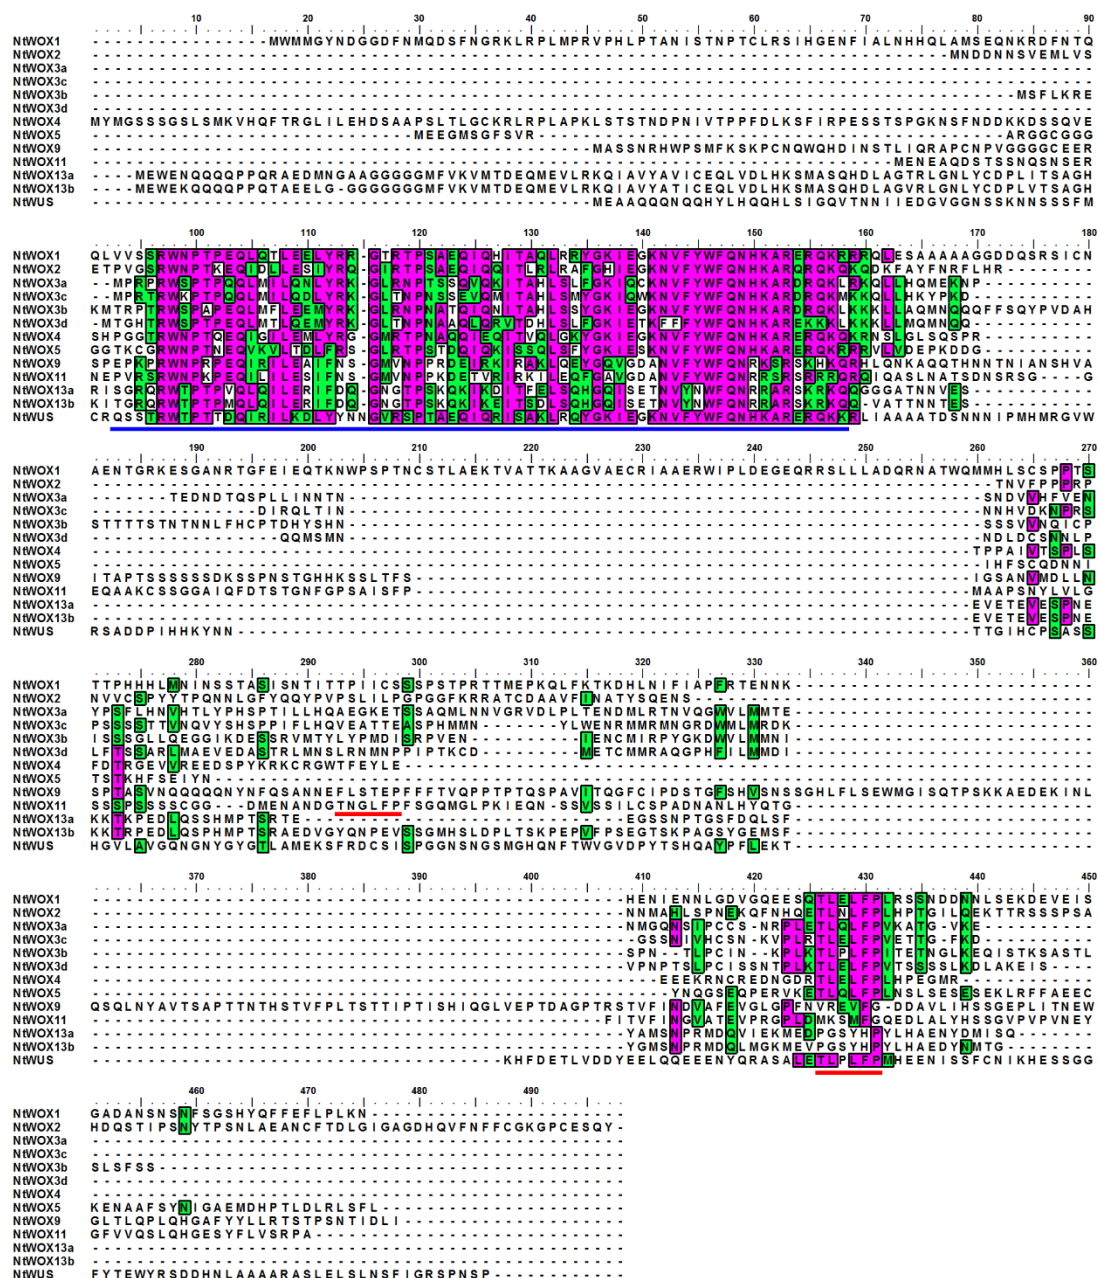

**Figure S5. Sequence alignment of WOX protein sequences in tobacco**

Identical residues are outlined and shaded orchid. Similar residues are outlined and shaded green. HD domain was labelled with blue line, and WUS-like motif in WOX11 was labelled with red line.
